# Supplementary material for: Elevated Cardiac Biomarkers in Relatively Healthy U.S. Adults
Source: bioRxiv or medRxiv preprint supplement (doi:10.1101/2023.11.27.23299072), 2023-11-27
Supplement: Supplementary file [file media-1.pdf]

## SUPPLEMENTARY MATERIALS

| <b>Table S1. The association of cardiac biomarkers with cardiovascular and all-cause mortality, excluding participants with hyperlipidemia and current smoking.</b>                                                               |                                 |                 |                            |                 |
|-----------------------------------------------------------------------------------------------------------------------------------------------------------------------------------------------------------------------------------|---------------------------------|-----------------|----------------------------|-----------------|
|                                                                                                                                                                                                                                   | <b>Cardiovascular Mortality</b> |                 | <b>All-Cause Mortality</b> |                 |
|                                                                                                                                                                                                                                   | <b>HR (95% CI)</b>              | <b><i>p</i></b> | <b>HR (95% CI)</b>         | <b><i>p</i></b> |
| No. of events                                                                                                                                                                                                                     | 43                              |                 | 185                        |                 |
| <b>hsTnT</b>                                                                                                                                                                                                                      | 4.84 (1.26, 18.46)              | 0.02            | 1.64 (1.28, 2.09)          | 0.0002          |
| <b>hsTnI (Abbott)</b>                                                                                                                                                                                                             | 2.04 (1.41, 2.96)               | 0.0004          | 1.39 (1.14, 1.68)          | 0.002           |
| <b>hsTnI (Ortho)</b>                                                                                                                                                                                                              | 1.52 (1.21, 1.92)               | 0.0007          | 1.00 (0.35, 2.85)          | 1.00            |
| <b>hsTnI (Siemens)</b>                                                                                                                                                                                                            | 1.31 (0.84, 2.04)               | 0.22            | 1.20 (1.01, 1.44)          | 0.04            |
| <b>NT-proBNP</b>                                                                                                                                                                                                                  | 2.25 (1.16, 4.33)               | 0.02            | 1.23 (1.09, 1.39)          | 0.002           |
| Modes adjusted for age, sex, race or ethnicity, insurance, former smoking, survey year, food insecurity, BMI, hemoglobin A1c, total cholesterol, systolic blood pressure, physical activity, use of ACEi/ARB, use of statin, eGFR |                                 |                 |                            |                 |

| <b>Table S2. The association of cardiac biomarkers with all-cause mortality among adults without subclinical CVD.</b> |                                |                 |                             |                 |
|-----------------------------------------------------------------------------------------------------------------------|--------------------------------|-----------------|-----------------------------|-----------------|
|                                                                                                                       | <b>Without Subclinical CVD</b> |                 | <b>With Subclinical CVD</b> |                 |
|                                                                                                                       | <b>HR (95% CI)</b>             | <b><i>p</i></b> | <b>HR (95% CI)</b>          | <b><i>p</i></b> |
| No. of events                                                                                                         | 303                            |                 | 138                         |                 |
| <b>hsTnT</b>                                                                                                          |                                |                 |                             |                 |
| Model 1                                                                                                               | 1.26 (0.93, 1.71)              | 0.13            | 1.39 (1.03, 1.86)           | 0.03            |
| Model 2                                                                                                               | 1.17 (0.87, 1.58)              | 0.29            | 1.45 (1.05, 1.99)           | 0.02            |
| Model 3                                                                                                               | 1.20 (0.88, 1.64)              | 0.25            | 1.47 (1.07, 2.02)           | 0.02            |
| <b>hsTnI (Abbott)</b>                                                                                                 |                                |                 |                             |                 |
| Model 1                                                                                                               | 1.10 (0.89, 1.37)              | 0.37            | 1.70 (1.24, 2.32)           | 0.001           |
| Model 2                                                                                                               | 1.08 (0.86, 1.35)              | 0.52            | 1.55 (1.12, 2.14)           | 0.009           |
| Model 3                                                                                                               | 1.08 (0.86, 1.35)              | 0.50            | 1.55 (1.12, 2.14)           | 0.009           |
| <b>hsTnI (Ortho)</b>                                                                                                  |                                |                 |                             |                 |
| Model 1                                                                                                               | 1.13 (0.97, 1.32)              | 0.11            | 1.84 (1.43, 2.37)           | <0.0001         |
| Model 2                                                                                                               | 1.13 (0.94, 1.37)              | 0.19            | 1.68 (1.30, 2.17)           | 0.0002          |
| Model 3                                                                                                               | 1.13 (0.94, 1.36)              | 0.19            | 1.68 (1.30, 2.17)           | 0.0002          |
| <b>hsTnI (Siemens)</b>                                                                                                |                                |                 |                             |                 |
| Model 1                                                                                                               | 1.06 (0.92, 1.23)              | 0.42            | 1.22 (0.95, 1.56)           | 0.11            |
| Model 2                                                                                                               | 1.05 (0.90, 1.21)              | 0.55            | 1.12 (0.87, 1.44)           | 0.37            |
| Model 3                                                                                                               | 1.05 (0.90, 1.20)              | 0.54            | 1.12 (0.87, 1.44)           | 0.37            |
| <b>NT-proBNP</b>                                                                                                      |                                |                 |                             |                 |
| Model 1                                                                                                               | 1.16 (1.01, 1.33)              | 0.04            | 1.34 (1.12, 1.61)           | 0.002           |
| Model 2                                                                                                               | 1.13 (0.98, 1.30)              | 0.08            | 1.31 (1.06, 1.66)           | 0.03            |
| Model 3                                                                                                               | 1.14 (0.99, 1.31)              | 0.08            | 1.31 (1.03, 1.67)           | 0.03            |

Model 1: adjusted for age, sex, race or ethnicity, insurance, smoking, survey year, food insecurity.  
 Model 2: adjusted for Model 2 + BMI, hemoglobin A1c, total cholesterol, systolic blood pressure, physical activity, use of ACEi/ARB, use of statin.  
 Model 3: adjusted for Model 3 + eGFR

| <b>Table S3. The association of subclinical CVD with cardiovascular and all-cause mortality.</b>                                                                                                                                                                                                                                                                                                                                                                                                                                                                                           |                                 |          |                            |          |
|--------------------------------------------------------------------------------------------------------------------------------------------------------------------------------------------------------------------------------------------------------------------------------------------------------------------------------------------------------------------------------------------------------------------------------------------------------------------------------------------------------------------------------------------------------------------------------------------|---------------------------------|----------|----------------------------|----------|
|                                                                                                                                                                                                                                                                                                                                                                                                                                                                                                                                                                                            | <b>Cardiovascular Mortality</b> |          | <b>All-Cause Mortality</b> |          |
|                                                                                                                                                                                                                                                                                                                                                                                                                                                                                                                                                                                            | <b>HR (95% CI)</b>              | <b>p</b> | <b>HR (95% CI)</b>         | <b>p</b> |
| No. of events                                                                                                                                                                                                                                                                                                                                                                                                                                                                                                                                                                              | 83                              |          | 441                        |          |
| <b>Subclinical CVD defined by hs-cTnT and NT-proBNP <sup>a</sup></b>                                                                                                                                                                                                                                                                                                                                                                                                                                                                                                                       |                                 |          |                            |          |
| Crude                                                                                                                                                                                                                                                                                                                                                                                                                                                                                                                                                                                      | 6.75 (3.58, 12.73)              | <0.0001  | 4.23 (2.37, 5.49)          | <0.0001  |
| Model 1                                                                                                                                                                                                                                                                                                                                                                                                                                                                                                                                                                                    | 2.15 (1.03, 4.51)               | 0.04     | 1.87 (1.33, 1.62)          | 0.0006   |
| Model 2                                                                                                                                                                                                                                                                                                                                                                                                                                                                                                                                                                                    | 2.00 (0.82, 4.88)               | 0.13     | 1.62 (1.09, 2.42)          | 0.02     |
| Model 3                                                                                                                                                                                                                                                                                                                                                                                                                                                                                                                                                                                    | 1.97 (0.78, 4.97)               | 0.15     | 1.62 (1.08, 2.42)          | 0.02     |
| <b>Subclinical CVD defined by hs-cTnI (Abbott) <sup>b</sup></b>                                                                                                                                                                                                                                                                                                                                                                                                                                                                                                                            |                                 |          |                            |          |
| Crude                                                                                                                                                                                                                                                                                                                                                                                                                                                                                                                                                                                      | 3.00 (0.36, 24.17)              | 0.30     | 2.57 (1.08, 6.12)          | 0.03     |
| Model 1                                                                                                                                                                                                                                                                                                                                                                                                                                                                                                                                                                                    | 2.37 (0.36, 15.76)              | 0.36     | 2.24 (1.17, 4.27)          | 0.02     |
| Model 2                                                                                                                                                                                                                                                                                                                                                                                                                                                                                                                                                                                    | 2.29 (0.27, 19.39)              | 0.44     | 1.81 (0.89, 3.69)          | 0.10     |
| Model 3                                                                                                                                                                                                                                                                                                                                                                                                                                                                                                                                                                                    | 2.27 (0.26, 19.70)              | 0.45     | 1.81 (0.88, 3.69)          | 0.10     |
| <p>Model 1: adjusted for age, sex, race or ethnicity, insurance, smoking status, survey year, food insecurity.<br/>           Model 2: adjusted for Model 2 + BMI, hemoglobin A1c, total cholesterol, systolic blood pressure, physical activity, use of ACEi/ARB, use of statin.<br/>           Model 3: adjusted for Model 3 + eGFR</p> <p><sup>a</sup> Subclinical CVD defined by hs-cTnT ≥22 ng/L among men or hs-cTnT ≥14 ng/L among women or NT-proBNP &gt;125 pg/mL.<br/> <sup>b</sup> Subclinical CVD defined by hs-cTnI (Abbott) ≥12 ng/L among men and ≥10 ng/L among women.</p> |                                 |          |                            |          |
